# Supplementary material for: Reg proteins promote acinar-to-ductal metaplasia and act as novel diagnostic and prognostic markers in pancreatic ductal adenocarcinoma
Source: PubMed Central journal article supplement (PMC5363625; doi:10.18632/oncotarget.12834), 2016-10-24
Supplement: oncotarget-07-77838-s001.pdf [file oncotarget-07-77838-s001.pdf]

## Reg proteins promote acinar-to-ductal metaplasia and act as novel diagnostic and prognostic markers in pancreatic ductal adenocarcinoma

### SUPPLEMENTARY TABLES

**Supplementary Table S1: Correlation of serum Reg proteins levels with TNM staging and histology grading of PDAC. N=41**

|                               |                         | Reg1A   | Reg1B  | Reg3A  | Reg3G  | Reg4  |
|-------------------------------|-------------------------|---------|--------|--------|--------|-------|
| <b>TNM stages</b>             | Correlation Coefficient | 0.101   | 0.313  | -0.158 | -0.191 | 0.141 |
|                               | P value                 | 0.530   | 0.047* | 0.324  | 0.232  | 0.378 |
| <b>Differentiation Grades</b> | Correlation Coefficient | -0.446  | -0.343 | -0.273 | 0.004  | 0.095 |
|                               | P value                 | 0.003** | 0.028* | 0.084  | 0.980  | 0.554 |

The statistical analysis was performed by using a Spearman's test. \*P<0.05.

**Supplementary Table S2: Nucleotide sequences of primers used for quantitative PCR**

| <b>Gene name</b> | <b>Forward Primer</b>     | <b>Reverse Primer</b>    |
|------------------|---------------------------|--------------------------|
| Reg1A            | GAGAAGCCAACCTCAGACTCAG    | TGAGACAGAAACATCAGGCAG    |
| Reg1B            | GGTCCTGCAATTACTATGAAGTCAA | AAGATCAGCGATGCAAACCTCATT |
| GAPDH            | TGACAACCTTGGTATYCGTGGAAGG | AGGCAGGGATGATGTTCTGGAGAG |
